# Supplementary material for: BioProfiling.jl: profiling biological perturbations with high-content imaging in single cells and heterogeneous populations
Source: Oxford University Press journal article supplement (doi:10.1093/bioinformatics/btab853), 2021-12-16
Supplement: btaa853_supplementary_data.pdf [file btaa853_supplementary_data.pdf]

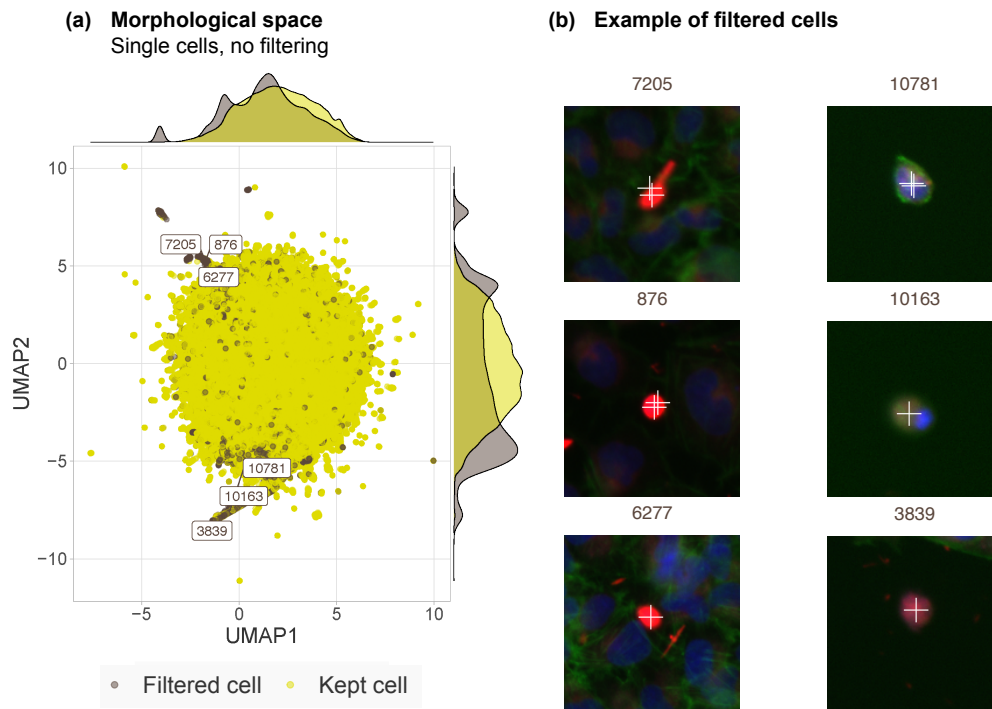

**Supp. Figure 1: Filtering of artifacts and biological outliers is required for defining an informative morphological space.** **(a)** UMAP embedding preserving the Euclidean distance between the morphological profiles of single cells in the plate seeded with 750 cells per well and without any filtering. Cells that we excluded from further analysis based on a set of feature thresholds (see Methods) are highlighted in brown. Six individual cells are labeled with a unique identifier. Marginal plots show relative density of filtered and kept cells. **(b)** Cropped images of six example cells discarded from further analyses along with their unique identifier. Channels are CellMask (red), phalloidin (green) and DAPI (blue). All images are shown at the same scale.

**(a) Morphological space**  
1500 cells per well

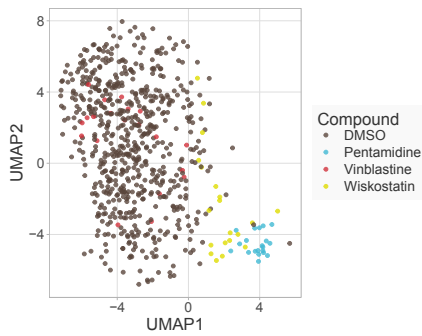

**(b) Identification of hits**  
1500 cells per well

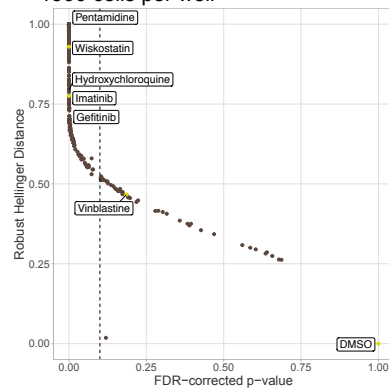

**(c) Hit agreement between seeding densities**

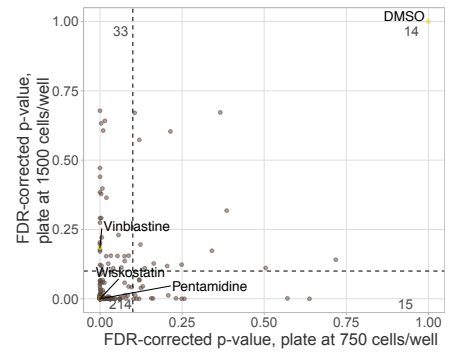

**Supp. Figure 2: BioProfiling.jl profiles of plates seeded with 750 and 1500 cells per well show similarities. (a)** UMAP embedding preserving the cosine distance between the morphological profiles aggregated per field of view in the plate seeded with 1500 cells per well. Two out of four dimensions are represented. **(b)** Robust Hellinger distance and Robust Morphological Perturbation Value (FDR-corrected p-value) of each compound in the plate seeded with 1500 cells per well compared to DMSO. Vertical dotted line indicates an FDR threshold of 0.1 and all compounds on its left are defined as morphological hits. **(c)** FDR-corrected p-value of the significance of morphological changes induced by each compound in both plates. Dotted lines indicate an FDR threshold of 0.1 and a number indicates the number of points in each of the regions delineated by the dotted lines.

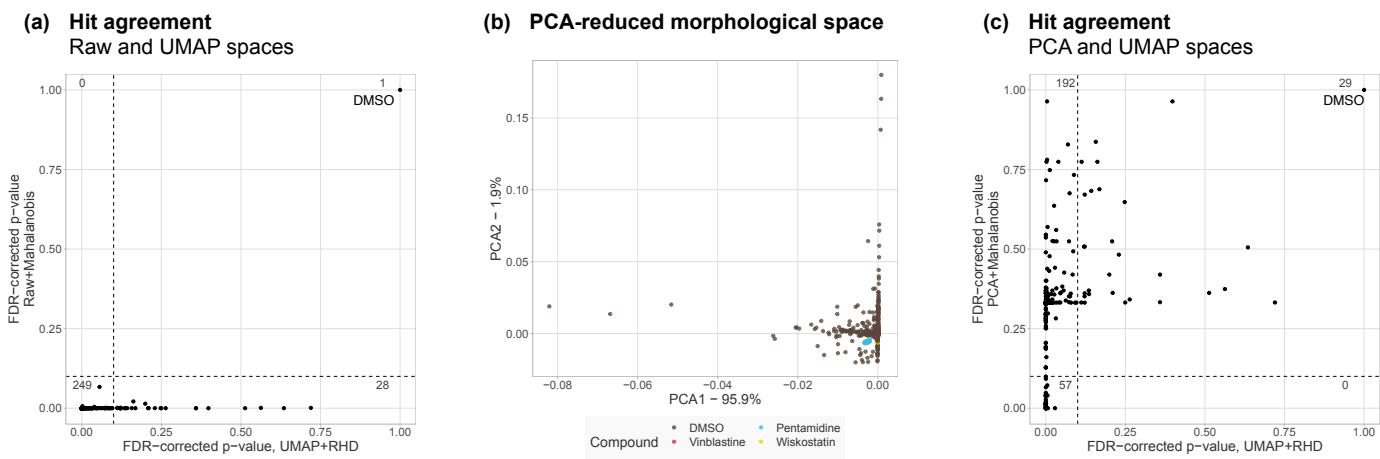

**Supp. Figure 3: BioProfiling.jl supports various approaches to hit detection.** (a) FDR-corrected p-value of the significance of morphological changes induced by each compound based either on the robust Hellinger distance in the UMAP-reduced space or the Mahalanobis distance to the center of the DMSO profiles in the original space. (b) PCA embedding of the morphological profiles aggregated per field of view in the plate seeded with 750 cells per well. (c) FDR-corrected p-value of the significance of morphological changes induced by each compound based either on the robust Hellinger distance in the UMAP-reduced space or the Mahalanobis distance to the center of the DMSO profiles in the PCA space. In (a) and (c), dotted lines indicate an FDR threshold of 0.1 and a number indicates the number of points in each of the regions delineated by the dotted lines.

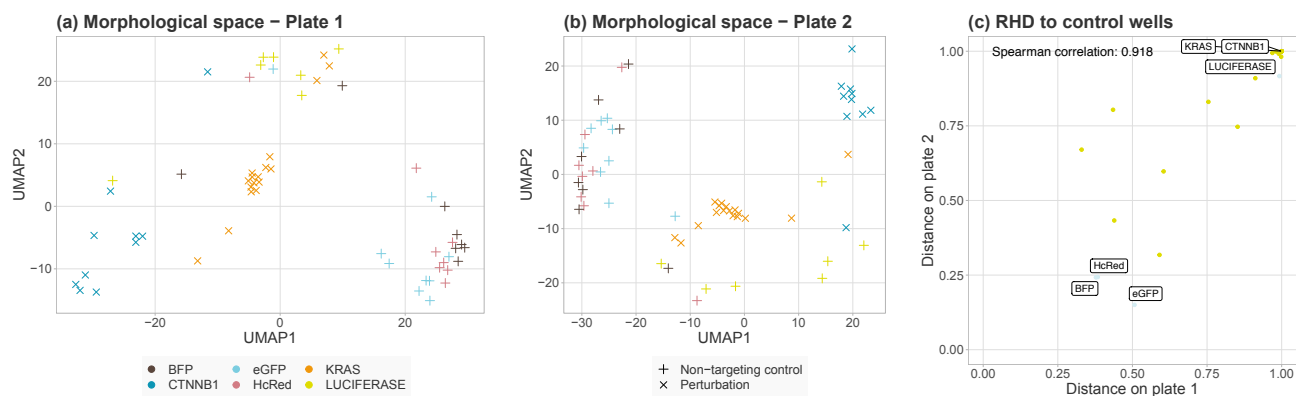

**Supp. Figure 4: BioProfiling.jl generates robust morphological profiles from CellPainting experiments. (a-b)** UMAP embedding preserving the Euclidean distance between the morphological profiles aggregated per well in plate 1 (a) or plate 2 (b), subsetted to non-targeting controls and overexpression of CTNNB1 and KRAS. **(c)** Robust Hellinger Distance (RHD) between each perturbation and the non-targeting profiles in both plates. Data source: Cell Painting Image Collection (see Methods).

| Compound name                                                          | MOA                                | Targets                                                              | RMPV750 | RMPV1500 | Conc.     |
|------------------------------------------------------------------------|------------------------------------|----------------------------------------------------------------------|---------|----------|-----------|
| (+)-Butaclamol hydrochloride                                           |                                    |                                                                      | 0.2479  | 0        | 0.02      |
| (+)-Cyclazocine                                                        |                                    |                                                                      | 0.0288  | 0.0012   | 20        |
| (+/-)-Sulfinpyrazone                                                   | ["Uricosuric blocker"]             | ["ABCC1", "ABCC2", "FPR1", "SLC22A12"]                               | 0.0019  | 0.0154   | 20        |
| (-)-JQ1                                                                |                                    |                                                                      | 0.0004  | 0        | 20        |
| (-)-Perillic acid                                                      |                                    |                                                                      | 0.157   | 0.0018   | 20        |
| (-)-Quinpirole hydrochloride                                           | ["Dopamine receptor agonist"]      | ["DRD2", "DRD3", "DRD4", "DRD1", "HTR1A", "HTR2A", "HTR2B", "HTR2C"] | 0.0016  | 0.1061   | 0.2       |
| (-)-trans-(1S,2S)-U-50488 hydrochloride                                |                                    |                                                                      | 0.0087  | 0.0278   | 20        |
| (S)-(+)-Camptothecin                                                   |                                    |                                                                      |         | 0        | 20        |
| (S)-Propranolol hydrochloride                                          | ["Adrenergic receptor antagonist"] | ["ADRB2", "ADRB3", "ADRB1", "CYP2C19", "HTR1A", "HTR1B"]             | 0.0287  | 0        | 2         |
| (±)-Isoproterenol hydrochloride                                        |                                    |                                                                      |         |          | 20        |
| (±)-Methoxyverapamil hydrochloride                                     |                                    |                                                                      |         |          | 0.2       |
| (±)-Metoprolol (+)-tartrate                                            |                                    |                                                                      |         |          | 0.2       |
| (±)-Octoclothepein maleate                                             |                                    |                                                                      |         |          | 20        |
| (±)-SKF-38393 hydrochloride                                            |                                    |                                                                      |         |          | 20        |
| (±)-Sulpiride                                                          |                                    |                                                                      |         |          | 0.02      |
| (±)-Verapamil hydrochloride                                            |                                    |                                                                      |         |          | 2         |
| (±)-alpha-Lipoic Acid                                                  |                                    |                                                                      |         |          | 2         |
| 1,10-Phenanthroline monohydrate                                        |                                    |                                                                      | 0.0208  | 0.0026   | 2         |
| 1,7-Dimethylxanthine                                                   |                                    |                                                                      | 0.0558  | 0.1604   | 20        |
| 2,2'-Bipyridyl                                                         |                                    |                                                                      | 0.0013  | 0.0308   | 20        |
| 2,3-Dimethoxy-1,4-naphthoquinone                                       |                                    |                                                                      | 0.0055  | 0.0642   | 0.02      |
| 2-Phenylaminoadenosine                                                 |                                    |                                                                      | 0.1222  | 0        | 20        |
| 2-methoxyestradiol                                                     |                                    |                                                                      | 0       | 0.1733   | 2         |
| 4-(2-Aminoethyl)benzenesulfonyl fluoride hydrochloride                 |                                    |                                                                      | 0       | 0.0015   | 20        |
| 4-Hydroxy-3-methoxyphenylacetic acid                                   |                                    |                                                                      | 0       | 0.1915   | 20        |
| 5-(N,N-hexamethylene)amiloride                                         |                                    |                                                                      | 0       | 0        | 20.000633 |
| 5-(N-Ethyl-N-isopropyl)amiloride                                       |                                    |                                                                      | 0       | 0        | 19.999068 |
| 5-Bromo-2'-deoxyuridine                                                |                                    |                                                                      | 0       | 0        | 20        |
| 5-Fluorouracil                                                         |                                    |                                                                      | 0       | 0        | 20        |
| 5-azacytidine                                                          |                                    |                                                                      | 0       | 0        | 19.99822  |
| 5HPP-33                                                                |                                    |                                                                      | 0.398   | 0.3161   | 0.02      |
| 5alpha-Pregnan-3alpha-ol-20-one                                        |                                    |                                                                      | 0.0173  | 0        | 20        |
| 6,7-ADTN hydrobromide                                                  |                                    |                                                                      | 0       | 0.3031   | 0.02      |
| 6-Nitroso-1,2-benzopyrone                                              |                                    |                                                                      | 0       | 0        | 0.02      |
| 7-Cyclopentyl-5-(4-phenoxy)phenyl-7H-pyrrolo[2,3-d]pyrimidin-4-ylamine |                                    |                                                                      | 0.0016  | 0        | 20        |

| Compound name                         | MOA                                                                                  | Targets                                                                                                                                       | RMPV750 | RMPV1500 | Conc.     |
|---------------------------------------|--------------------------------------------------------------------------------------|-----------------------------------------------------------------------------------------------------------------------------------------------|---------|----------|-----------|
| A-77636 hydrochloride                 |                                                                                      |                                                                                                                                               |         |          | 20.000382 |
| AC-93253 iodide                       |                                                                                      |                                                                                                                                               | 0       | 0        | 0.2       |
| AEG 3482                              |                                                                                      |                                                                                                                                               | 0       | 0        | 20        |
| AMG 9810                              | ["TRPV antagonist"]                                                                  | ["TRPV1"]                                                                                                                                     | 0.0314  | 0.0003   | 2         |
| AZ191                                 |                                                                                      |                                                                                                                                               |         |          | 20        |
| Acepromazine maleate                  | ["Dopamine receptor antagonist"]                                                     | ["ADRA1A", "ADRA1B", "DRD1", "DRD2", "HTR1A", "HTR2A"]                                                                                        | 0.1114  | 0.0097   | 0.02      |
| Adaphostin                            |                                                                                      |                                                                                                                                               |         |          | 20        |
| Albendazole                           | ["Anthelmintic", "Tubulin inhibitor"]                                                | ["CYP1A2", "CYP2J2", "TUBA1A", "TUBB", "TUBB4B"]                                                                                              | 0       | 0        | 20        |
| Aliskiren                             | ["Antihypertensive", "Peptidase inhibitor", "Protease inhibitor", "Renin inhibitor"] | ["REN"]                                                                                                                                       | 0.0063  | 0.2234   | 20        |
| Ammonium pyrrolidinedithiocarbamate   |                                                                                      |                                                                                                                                               |         | 0        | 20        |
| Amodiaquine                           | ["Histamine receptor agonist"]                                                       | ["HNMT", "CYP2C8"]                                                                                                                            | 0       | 0        | 20        |
| Amsacrine hydrochloride               | ["Topoisomerase inhibitor"]                                                          | ["TOP2A", "KCNH2"]                                                                                                                            | 0.2101  | 0.5859   | 2         |
| Ancitabine hydrochloride              |                                                                                      |                                                                                                                                               | 0       | 0        | 0.2       |
| Apomorphine hydrochloride hemihydrate |                                                                                      | ["DRD2", "DRD5", "ADRA2A", "ADRA2B", "ADRA2C", "DRD1", "DRD3", "DRD4", "HTR1A", "HTR2A", "HTR2B", "HTR2C", "TRPA1", "CALY", "HTR1B", "HTR1D"] | 0.0126  | 0.0012   | 1.9999762 |
| Arbidol hydrochloride                 |                                                                                      |                                                                                                                                               | 0.0039  | 0.1244   | 2         |
| Auranofin                             |                                                                                      |                                                                                                                                               |         |          | 20        |
| Aurora-A Inhibitor I                  |                                                                                      |                                                                                                                                               | 0.1221  | 0.0731   | 20.000985 |
| Aurothioglucose                       |                                                                                      |                                                                                                                                               | 0       |          | 20        |
| Azatadine                             |                                                                                      |                                                                                                                                               | 0.1125  | 0.6573   | 20        |
| Azithromycin                          | ["Bacterial 50S ribosomal subunit inhibitor"]                                        | ["MLNR"]                                                                                                                                      | 0.1359  | 0.1024   | 2         |
| BAY 61-3606 hydrochloride hydrate     |                                                                                      |                                                                                                                                               |         | 0        | 20        |
| BIO                                   |                                                                                      |                                                                                                                                               | 0       | 0.0003   | 20        |
| BIX 01294 trihydrochloride hydrate    |                                                                                      |                                                                                                                                               |         |          | 20        |
| BMS-193885                            |                                                                                      |                                                                                                                                               |         | 0        | 20        |
| BRD3308                               |                                                                                      |                                                                                                                                               | 0       | 0        | 20        |
| BTO-1                                 |                                                                                      |                                                                                                                                               | 0.0842  | 0.0118   | 19.998522 |
| BW 723C86                             | ["Serotonin receptor agonist"]                                                       | ["HTR2B", "HTR2A", "HTR2C"]                                                                                                                   | 0.0126  | 0        | 0.02      |
| Bay 11-7082                           |                                                                                      |                                                                                                                                               |         |          | 20        |
| Bay 11-7085                           |                                                                                      |                                                                                                                                               |         |          | 19.999076 |
| Benidipine hydrochloride              | ["Calcium channel blocker"]                                                          | ["CACNA1C", "CACNA1G", "CYP3A5"]                                                                                                              | 0       | 0        | 20        |
| Benoxathian hydrochloride             |                                                                                      |                                                                                                                                               | 0.0004  | 0        | 20        |
| Benzamil hydrochloride                |                                                                                      | ["PKD2L1", "SCNN1A", "SCNN1B", "SCNN1G", "ASIC1", "SCNN1D", "SLC8A1"]                                                                         | 0.0004  | 0        | 20.000339 |
| Benztropine mesylate                  |                                                                                      |                                                                                                                                               | 0       | 0        | 20.00068  |
| Bortezomib                            |                                                                                      |                                                                                                                                               |         |          | 20        |

| Compound name                             | MOA                                                                                                                                                                                                                       | Targets                                                                                                                                                                                                                                                 | RMPV750 | RMPV1500 | Conc.     |
|-------------------------------------------|---------------------------------------------------------------------------------------------------------------------------------------------------------------------------------------------------------------------------|---------------------------------------------------------------------------------------------------------------------------------------------------------------------------------------------------------------------------------------------------------|---------|----------|-----------|
| Brefeldin A from Penicillium brefeldianum | ["Protein synthesis inhibitor", "Brefeldin A inhibited guanine nucleotide exchange protein inhibitor", "Golgi-specific brefeldin A-resistance guanine nucleotide exchange factor inhibitor"]                              | ["ARF1", "ARFGEF1", "ARFGEF2", "CYTH2", "GBF1", "SAR1A"]                                                                                                                                                                                                | 0       | 0        | 20        |
| Brequinar sodium salt hydrate             |                                                                                                                                                                                                                           |                                                                                                                                                                                                                                                         | 0       | 0        | 0.2       |
| Budesonide                                |                                                                                                                                                                                                                           | ["NR3C1", "CYP3A5", "CYP3A7"]                                                                                                                                                                                                                           | 0       | 0        | 19.999503 |
| CCCI-01                                   |                                                                                                                                                                                                                           |                                                                                                                                                                                                                                                         | 0       | 0        | 20        |
| CCT137690                                 |                                                                                                                                                                                                                           |                                                                                                                                                                                                                                                         |         | 0        | 2         |
| CGS-15943                                 | ["Adenosine receptor antagonist"]                                                                                                                                                                                         | ["ADORA1", "ADORA2A", "ADORA2B", "ADORA3"]                                                                                                                                                                                                              | 0.1351  | 0.5604   | 2         |
| CID 11210285 hydrochloride                |                                                                                                                                                                                                                           |                                                                                                                                                                                                                                                         | 0       | 0        | 20        |
| CID2858522                                |                                                                                                                                                                                                                           |                                                                                                                                                                                                                                                         | 0.0053  | 0        | 20        |
| CP466722                                  | ["ATM kinase inhibitor"]                                                                                                                                                                                                  | ["ATM"]                                                                                                                                                                                                                                                 | 0       | 0        | 20        |
| CYM50358                                  |                                                                                                                                                                                                                           |                                                                                                                                                                                                                                                         | 0       | 0        | 0.2       |
| Caffeic Acid                              | ["Lipoxygenase inhibitor", "HIV integrase inhibitor", "NFkB pathway inhibitor", "Nitric oxide production inhibitor", "PPAR receptor modulator", "TNF production inhibitor", "Tumor necrosis factor production inhibitor"] | ["ALOX5", "MIF", "RELA", "TNF"]                                                                                                                                                                                                                         | 0       | 0.0062   | 0.0200001 |
| Caffeic acid phenethyl ester              |                                                                                                                                                                                                                           | ["RELA"]                                                                                                                                                                                                                                                | 0.0326  | 0        | 0.02      |
| Calcimycin                                |                                                                                                                                                                                                                           |                                                                                                                                                                                                                                                         |         |          | 20        |
| Cantharidic Acid                          |                                                                                                                                                                                                                           |                                                                                                                                                                                                                                                         | 0.0071  | 0.0097   | 20        |
| Cantharidin                               |                                                                                                                                                                                                                           | String[]                                                                                                                                                                                                                                                | 0.0053  | 0        | 20        |
| Carmofur                                  | ["Thymidylate synthase inhibitor"]                                                                                                                                                                                        | ["TYMS"]                                                                                                                                                                                                                                                | 0       | 0        | 20        |
| Carvedilol                                | ["Adrenergic receptor antagonist"]                                                                                                                                                                                        | ["ADRB1", "ADRB2", "ADRA1A", "ADRA1B", "ADRA1D", "ADRA2A", "ADRA2B", "ADRA2C", "ADRB3", "CYP2C19", "CYP2E1", "GJA1", "HIF1A", "KCNH2", "NDUFC2", "NPPB", "RYSR2", "SELE", "VCAM1", "VEGFA"]                                                             | 0       | 0        | 20        |
| Cerivastatin                              |                                                                                                                                                                                                                           |                                                                                                                                                                                                                                                         |         |          | 20        |
| Chloroquine                               | ["Antimalarial"]                                                                                                                                                                                                          | ["CYP2C8", "GSTA2", "MRGPRX1", "TLR9", "TNF"]                                                                                                                                                                                                           | 0       | 0        | 20        |
| Chlorpromazine hydrochloride              | ["Dopamine receptor antagonist"]                                                                                                                                                                                          | ["DRD2", "ADRA2A", "ADRA2B", "ADRA2C", "DRD1", "DRD3", "DRD4", "DRD5", "HRH1", "HTR1A", "HTR2A", "HTR2C", "HTR6", "HTR7", "ADRA1A", "ADRA1B", "ADRA1D", "CALM1", "CHRM1", "CHRM3", "HRH4", "HTR2B", "KCNH2", "KIF11", "ORM1", "ORM2", "SMPD1", "TRPC5"] | 0.0022  | 0.6397   | 0.02      |

| Compound name                                     | MOA                                                                                                   | Targets                                                                                                                      | RMPV750 | RMPV1500 | Conc.     |
|---------------------------------------------------|-------------------------------------------------------------------------------------------------------|------------------------------------------------------------------------------------------------------------------------------|---------|----------|-----------|
| Chlorprothixene hydrochloride                     | ["Dopamine receptor antagonist"]                                                                      | ["DRD2", "CHRM1", "CHRM2", "CHRM3", "CHRM4", "CHRM5", "DRD1", "DRD3", "HRH1", "HTR2A", "HTR2B", "HTR2C"]                     | 0       | 0        | 20        |
| Cilengitide trifluoroacetic acid salt             |                                                                                                       |                                                                                                                              | 0       | 0        | 20        |
| Cilnidipine                                       | ["Calcium channel blocker"]                                                                           | ["CACNA1B", "CACNA1C"]                                                                                                       | 0.0007  | 0        | 20        |
| Cinacalcet                                        |                                                                                                       |                                                                                                                              |         |          | 20        |
| Clemizole hydrochloride                           |                                                                                                       | String[]                                                                                                                     | 0.2636  | 0        | 21        |
| Clodronic acid                                    |                                                                                                       | ["SLC25A4", "SLC25A5", "SLC25A6"]                                                                                            | 0.001   | 0.0635   | 20        |
| Clofarabine                                       | ["Ribonucleoside reductase inhibitor"]                                                                | ["RRM1", "POLA1", "RRM2", "SLC22A8"]                                                                                         | 0.0332  | 0        | 2         |
| Clomipramine hydrochloride                        | ["Serotonin transporter inhibitor (SERT)"]                                                            | ["SLC6A4", "SLC6A2", "CYP2C19", "GSTP1", "HTR2A", "HTR2B", "HTR2C", "SLC6A3"]                                                | 0.1222  | 0.041    | 2         |
| Clotrimazole                                      | ["Cytochrome P450 inhibitor", "Imidazoline receptor ligand"]                                          | ["KCNN4", "CYP3A4", "CYP51A1", "NR1I2", "NR1I3", "TRPM2", "TRPM4", "TRPM8"]                                                  | 0       | 0        | 20        |
| Colchicine                                        |                                                                                                       | ["TUBB", "GLRA1", "GLRA2", "TUBB1"]                                                                                          | 0.0167  | 0.6355   | 2         |
| Cyclosporin A                                     |                                                                                                       | ["PPIA", "ABCB11", "CAMLG", "CYP3A5", "CYP3A7", "FPR1", "PPID", "PPIF", "PPP3CA", "PPP3R2", "SLC10A1", "SLCO1B1", "SLCO1B3"] | 0       | 0        | 20        |
| Cyproterone acetate                               | ["Androgen receptor antagonist", "Progesterone receptor agonist", "Testosterone receptor antagonist"] | ["AR", "ADORA1", "ESR1"]                                                                                                     | 0       | 0.0178   | 0.02      |
| Cytarabine                                        | ["Ribonucleotide reductase inhibitor"]                                                                | ["POLB", "POLA1"]                                                                                                            | 0       | 0        | 20        |
| Cytosine-1-beta-D-arabinofuranoside hydrochloride |                                                                                                       |                                                                                                                              |         | 0        | 8.86      |
| D-Cycloserine                                     | ["Bacterial cell wall synthesis inhibitor"]                                                           | ["GRIN1"]                                                                                                                    | 0.0791  | 0.0635   | 35.985971 |
| D-ribofuranosylbenzimidazole                      |                                                                                                       |                                                                                                                              | 0.0045  | 0.0003   | 20        |
| DCEBIO                                            | ["Potassium channel activator"]                                                                       | ["KCNN2", "KCNN3", "KCNN4"]                                                                                                  | 0       | 0.6868   | 20        |
| Danshensu sodium salt                             |                                                                                                       |                                                                                                                              | 0.0039  | 0.2793   | 20        |
| Dantrolene sodium                                 | ["Calcium channel blocker"]                                                                           | ["RZR1", "RZR3"]                                                                                                             | 0.635   | 0        | 2         |
| Dequalinium chloride hydrate                      |                                                                                                       | ["KCNN1", "KCNN3"]                                                                                                           | 0       | 0        | 2         |
| Digitoxin                                         |                                                                                                       |                                                                                                                              |         |          | 20        |
| Dihydroartemisinin                                |                                                                                                       |                                                                                                                              | 0       | 0        | 20        |
| Dihydroergotamine                                 |                                                                                                       | ["HTR1D", "HTR1B", "ADRA2A", "DRD2", "HTR1E", "HTR1F", "HTR2B", "HTR7"]                                                      | 0.1428  | 0.0401   | 20        |
| Dihydroergotamine methanesulfonate                |                                                                                                       | ["HTR1D", "HTR1B", "ADRA2A", "DRD2", "HTR1E", "HTR1F", "HTR2B", "HTR7"]                                                      | 0.0034  | 0.007    | 20        |
| Dihydroouabain                                    |                                                                                                       |                                                                                                                              | 0.0053  | 0        | 2         |
| Diphenyleiodonium chloride                        | ["Nitric oxide synthase inhibitor"]                                                                   | ["ALDH1A2", "ALDH2", "ALDH5A1", "ALDH7A1", "NOX3", "XDH"]                                                                    | 0       | 0        | 20        |



| Compound name                   | MOA                                                                                                                   | Targets                                                                   | RMPV750 | RMPV1500 | Conc.  |
|---------------------------------|-----------------------------------------------------------------------------------------------------------------------|---------------------------------------------------------------------------|---------|----------|--------|
| Dipyridamole                    | ["Phosphodiesterase inhibitor"]                                                                                       | ["ADA", "PDE5A", "PDE10A", "PDE4A", "PDE7B", "PDE8A", "PDE8B", "SLC29A1"] | 0.3587  | 0.6785   | 2      |
| Docetaxel                       |                                                                                                                       | ["TUBB", "BCL2", "MAP2", "MAP4", "MAPT", "NR1I2", "TUBB1"]                | 0       | 0        | 2      |
| Domperidone                     | ["Dopamine receptor antagonist"]                                                                                      | ["DRD2", "DRD3", "ABCG2", "CYP3A5"]                                       | 0       | 0        | 0.2    |
| Doxazosin mesylate              | ["Adrenergic receptor antagonist"]                                                                                    | ["ADRA1D", "ADRA1A", "ADRA1B", "CYP2C19", "KCNH2", "KCNH6", "KCNH7"]      | 0.0107  | 0.6036   | 2      |
| Doxorubicin                     |                                                                                                                       | ["TOP2A"]                                                                 | 0       | 0        | 2      |
| Doxycycline hydrochloride       | ["Bacterial 30S ribosomal subunit inhibitor", "Metalloproteinase inhibitor"]                                          | ["MMP8", "MMP1"]                                                          | 0.0004  | 0        | 20     |
| Droperidol                      | ["Dopamine receptor antagonist"]                                                                                      | ["DRD2", "ADRA1A"]                                                        | 0.0045  | 0.3943   | 20     |
| E-64                            |                                                                                                                       |                                                                           | 0       | 0.1733   | 20     |
| Ebastine                        |                                                                                                                       |                                                                           | 0       | 0        | 20     |
| Efavirenz                       | ["HIV protease inhibitor"]                                                                                            | ["CYP2B6", "CYP2C19", "CYP2C8", "CYP3A4", "CYP3A5"]                       | 0.1994  | 0.014    | 0.0224 |
| Ellipticine                     | ["Topoisomerase inhibitor"]                                                                                           | ["TOP2A", "TOP2B"]                                                        | 0       | 0        | 2      |
| Emetine dihydrochloride hydrate | ["Protein synthesis inhibitor"]                                                                                       | ["RPS2"]                                                                  | 0       | 0        | 20     |
| Enclomiphene hydrochloride      |                                                                                                                       |                                                                           |         |          | 20     |
| Endoxifen                       |                                                                                                                       |                                                                           |         | 0        | 20     |
| Eptifibatide                    |                                                                                                                       |                                                                           | 0       | 0.1203   | 20     |
| Ethinyl Estradiol               | ["DNA directed DNA polymerase stimulant", "Estrogenic component in oral contraceptives", "Estrogen receptor agonist"] | ["CYP2C8", "ESR1", "ESR2", "NR1I2"]                                       | 0.0958  | 0.0479   | 0.02   |
| Etoposide                       |                                                                                                                       | ["TOP2A", "CYP2E1", "CYP3A5", "TOP2B"]                                    | 0       | 0        | 20     |
| Flunarizine dihydrochloride     | ["Calcium channel blocker"]                                                                                           | ["CACNA1G", "CACNA1H", "CACNA1I", "CALM1", "CYP2J2", "HRH1"]              | 0.0112  | 0        | 20     |
| Fluoxetine hydrochloride        | ["Selective serotonin reuptake inhibitor (SSRI)"]                                                                     | ["SLC6A4", "ANO1", "CYP2C19", "HTR2B"]                                    | 0       | 0        | 20     |
| Fluspirilene                    | ["Dopamine receptor antagonist"]                                                                                      | ["DRD2", "HTR2A", "CACNG1", "HRH1", "HTR1A", "HTR1D", "HTR1E"]            | 0.0206  | 0        | 20     |
| Forskolin                       |                                                                                                                       | ["ADCY2", "ADCY5", "GNAS"]                                                | 0.0013  | 0.0003   | 2      |
| Furamide dihydrochloride        |                                                                                                                       |                                                                           | 0       | 0        | 20     |
| GANT61                          |                                                                                                                       |                                                                           | 0       | 0.0003   | 20     |
| GBR-12909 dihydrochloride       |                                                                                                                       |                                                                           | 0       | 0        | 20     |
| GSK-650394                      |                                                                                                                       | ["SGK1", "SGK2"]                                                          | 0       | 0.0107   | 0.02   |
| GSK1210151A                     |                                                                                                                       |                                                                           | 0       | 0        | 20     |
| GW2974                          |                                                                                                                       |                                                                           | 0       | 0.0095   | 20     |
| GW9662                          |                                                                                                                       |                                                                           | 0.0048  | 0        | 20     |
| Gefitinib                       | ["EGFR inhibitor"]                                                                                                    | ["EGFR", "CYP2C19"]                                                       | 0.0403  | 0.0024   | 0.02   |
| Gemcitabine hydrochloride       | ["Ribonucleotide reductase inhibitor"]                                                                                | ["RRM1", "CMPK1", "RRM2", "TYMS"]                                         | 0       | 0        | 20     |

| Compound name                                  | MOA                                                                                                                           | Targets                                                                                                                                                                                                                             | RMPV750 | RMPV1500 | Conc.     |
|------------------------------------------------|-------------------------------------------------------------------------------------------------------------------------------|-------------------------------------------------------------------------------------------------------------------------------------------------------------------------------------------------------------------------------------|---------|----------|-----------|
| Histamine, R(-)-alpha-methyl-, dihydrochloride |                                                                                                                               |                                                                                                                                                                                                                                     | 0.5132  | 0.1118   | 0.02      |
| Hydroquinone                                   |                                                                                                                               |                                                                                                                                                                                                                                     | 0.0728  | 0.1129   | 0.02      |
| Hydroxychloroquine                             |                                                                                                                               | ["TLR7", "TLR9"]                                                                                                                                                                                                                    | 0.0763  | 0        | 20        |
| IKK-16 dihydrochloride                         | ["IKK inhibitor"]                                                                                                             | ["IKKBK"]                                                                                                                                                                                                                           | 0       | 0        | 0.02      |
| IMS2186                                        |                                                                                                                               |                                                                                                                                                                                                                                     | 0       | 0        | 20        |
| IN-1130                                        |                                                                                                                               |                                                                                                                                                                                                                                     | 0       | 0        | 20.000786 |
| Icaritin                                       |                                                                                                                               |                                                                                                                                                                                                                                     | 0       | 0.4267   | 20        |
| Idarubicin                                     |                                                                                                                               | ["TOP2A"]                                                                                                                                                                                                                           | 0       | 0        | 20        |
| Idazoxan hydrochloride                         |                                                                                                                               | ["NISCH"]                                                                                                                                                                                                                           | 0       | 0        | 2         |
| Imatinib                                       | ["BCR-ABL kinase inhibitor", "KIT inhibitor", "PDGFR receptor inhibitor"]                                                     | ["ABL1", "KIT", "PDGFRA", "BCR", "CSF1R", "PDGFRB", "ABCG2", "CYP2C19", "CYP2C8", "CYP3A5", "DDR1", "NTRK1", "RET"]                                                                                                                 | 0.1198  | 0        | 2         |
| Imatinib mesylate                              | ["BCR-ABL kinase inhibitor", "KIT inhibitor", "PDGFR receptor inhibitor"]                                                     | ["ABL1", "KIT", "PDGFRA", "BCR", "CSF1R", "PDGFRB", "ABCG2", "CYP2C19", "CYP2C8", "CYP3A5", "DDR1", "NTRK1", "RET"]                                                                                                                 | 0.0039  | 0        | 20        |
| Imipramine hydrochloride                       | ["Norepinephrine reuptake inhibitor", "Serotonin reuptake inhibitor"]                                                         | ["SLC6A2", "SLC6A4", "CHRM2", "ADRA1A", "ADRA1B", "ADRA1D", "CHRM1", "CHRM3", "CHRM4", "CHRM5", "CYP2C19", "DRD1", "DRD2", "DRD5", "HRH1", "HTR1A", "HTR2A", "HTR2C", "HTR6", "HTR7", "KCND2", "KCND3", "KCNH1", "KCNH2", "SLC6A3"] | 0       | 0        | 20        |
| Iodoacetamide                                  |                                                                                                                               |                                                                                                                                                                                                                                     | 0       | 0        | 20        |
| Irinotecan                                     |                                                                                                                               |                                                                                                                                                                                                                                     |         | 0        | 20        |
| Isoproterenol                                  |                                                                                                                               |                                                                                                                                                                                                                                     | 0.1221  | 0.0733   | 20        |
| JFD00244                                       |                                                                                                                               |                                                                                                                                                                                                                                     | 0       | 0        | 20        |
| JS-K                                           |                                                                                                                               | String[]                                                                                                                                                                                                                            | 0.0066  | 0.0012   | 20        |
| K114                                           |                                                                                                                               |                                                                                                                                                                                                                                     | 0       | 0        | 20        |
| KB-R7493                                       |                                                                                                                               |                                                                                                                                                                                                                                     | 0       | 0        | 20        |
| KT203                                          |                                                                                                                               |                                                                                                                                                                                                                                     | 0       | 0.0125   | 2         |
| KU-55933                                       | ["ATM kinase inhibitor"]                                                                                                      | ["ATM", "PRKDC"]                                                                                                                                                                                                                    | 0.0016  | 0.001    | 2         |
| KY-05009                                       |                                                                                                                               |                                                                                                                                                                                                                                     | 0       | 0        | 2.0001077 |
| Kenpauillone                                   | ["CDK inhibitor", "Glycogen synthase kinase inhibitor"]                                                                       | ["GSK3B", "CDK1", "CDK5", "CCNB1", "CDK2", "LCK"]                                                                                                                                                                                   | 0       | 0        | 20        |
| Ketoconazole                                   | ["Sterol demethylase inhibitor"]                                                                                              | ["AR", "CYP19A1", "CYP21A2", "CYP2C19", "CYP3A5", "CYP3A7", "KCNA10"]                                                                                                                                                               | 0.0013  | 0        | 20        |
| Ketotifen fumarate                             | ["Histamine receptor agonist", "Histamine receptor ligand", "Leukotriene receptor antagonist", "Phosphodiesterase inhibitor"] | ["HRH1", "PDE4A", "PDE4B", "PDE4C", "PDE4D", "PDE7A", "PDE7B", "PDE8A", "PDE8B", "PGD"]                                                                                                                                             | 0.0063  | 0.3895   | 20        |
| L-703,606 oxalate salt hydrate                 |                                                                                                                               |                                                                                                                                                                                                                                     | 0.0861  | 0.168    | 2         |
| L-741,626                                      |                                                                                                                               |                                                                                                                                                                                                                                     | 0       | 0        | 20        |
| L-Cycloserine                                  |                                                                                                                               |                                                                                                                                                                                                                                     | 0.073   | 0.1592   | 0.2       |

| Compound name                           | MOA                                                               | Targets                                                                                                                                                                                                                               | RMPV750 | RMPV1500 | Conc. |
|-----------------------------------------|-------------------------------------------------------------------|---------------------------------------------------------------------------------------------------------------------------------------------------------------------------------------------------------------------------------------|---------|----------|-------|
| L-Tryptophan                            |                                                                   |                                                                                                                                                                                                                                       | 0.0007  | 0.0354   | 2     |
| LDN-214117                              |                                                                   |                                                                                                                                                                                                                                       | 0.026   | 0.0084   | 2     |
| LP 12 hydrochloride hydrate             |                                                                   |                                                                                                                                                                                                                                       | 0.0007  | 0        | 20    |
| LP44                                    |                                                                   |                                                                                                                                                                                                                                       | 0       | 0        | 20    |
| LY-294,002 hydrochloride                |                                                                   |                                                                                                                                                                                                                                       | 0       | 0        | 20    |
| Lasofloxifene tartrate                  |                                                                   |                                                                                                                                                                                                                                       |         |          | 0.2   |
| Lercanidipine hydrochloride hemihydrate |                                                                   |                                                                                                                                                                                                                                       | 0.0019  | 0        | 20    |
| Levetiracetam                           | ["Calcium channel blocker"]                                       | ["SV2A", "CACNA1B", "SCN1A"]                                                                                                                                                                                                          | 0.0264  | 0.1362   | 20    |
| Loperamide                              | ["Opioid receptor agonist"]                                       | ["OPRM1", "OPRD1", "CACNA1A", "CALM1", "CYP2B6", "CYP2C8", "NPR2", "OPRK1", "POMC"]                                                                                                                                                   | 0       | 0        | 20    |
| Loperamide hydrochloride                | ["Opioid receptor agonist"]                                       | ["OPRM1", "OPRD1", "CACNA1A", "CALM1", "CYP2B6", "CYP2C8", "NPR2", "OPRK1", "POMC"]                                                                                                                                                   | 0       | 0        | 20    |
| Loratadine                              | ["Histamine receptor antagonist"]                                 | ["HRH1", "CYP2C19", "CYP3A5"]                                                                                                                                                                                                         | 0.1217  | 0.1974   | 0.02  |
| Lorcainide hydrochloride                |                                                                   |                                                                                                                                                                                                                                       | 0       | 0.0021   | 2     |
| Lubeluzole dihydrochloride              |                                                                   |                                                                                                                                                                                                                                       | 0       | 0        | 20    |
| M-110                                   |                                                                   |                                                                                                                                                                                                                                       | 0       | 0        | 20    |
| MG 624                                  |                                                                   |                                                                                                                                                                                                                                       | 0       | 0        | 20    |
| MK-677                                  |                                                                   |                                                                                                                                                                                                                                       | 0       | 0        | 0.2   |
| ML-7                                    | ["Myosin light chain kinase inhibitor"]                           | ["MYLK"]                                                                                                                                                                                                                              | 0.0016  | 0        | 20    |
| ML240                                   |                                                                   |                                                                                                                                                                                                                                       | 0.0882  | 0.0404   | 0.02  |
| ML324                                   |                                                                   |                                                                                                                                                                                                                                       | 0       | 0        | 20    |
| Maprotiline                             | ["Norepinephrine reuptake inhibitor", "Tricyclic antidepressant"] | ["SLC6A2", "ADRA1A", "ADRA1B", "ADRA1D", "ADRA2A", "ADRA2B", "ADRA2C", "CHRM1", "CHRM2", "CHRM3", "CHRM4", "CHRM5", "DRD2", "HRH1", "HTR2A", "HTR2C", "HTR7"]                                                                         | 0.0395  | 0.0015   | 2     |
| Maprotiline hydrochloride               | ["Norepinephrine reuptake inhibitor", "Tricyclic antidepressant"] | ["SLC6A2", "ADRA1A", "ADRA1B", "ADRA1D", "ADRA2A", "ADRA2B", "ADRA2C", "CHRM1", "CHRM2", "CHRM3", "CHRM4", "CHRM5", "DRD2", "HRH1", "HTR2A", "HTR2C", "HTR7"]                                                                         | 0       | 0        | 20    |
| Metergoline                             |                                                                   |                                                                                                                                                                                                                                       |         |          | 20    |
| Methiothepin mesylate                   |                                                                   |                                                                                                                                                                                                                                       | 0       | 0        | 20    |
| Methoxamine hydrochloride               |                                                                   | ["ADRA1A", "ADRA1B", "ADRA1D"]                                                                                                                                                                                                        | 0.0013  | 0.0537   | 0.2   |
| Metrazoline oxalate                     |                                                                   |                                                                                                                                                                                                                                       | 0       | 0        | 20    |
| Mibefradil dihydrochloride              | ["T-type calcium channel blocker"]                                | ["CACNA1G", "CACNA1H", "CACNA1C", "CACNA1I", "ANO1", "CACNA1D", "CACNA1F", "CACNA1S", "CACNB1", "CACNB2", "CACNB3", "CACNB4", "CATSPER1", "CATSPER2", "CATSPER3", "CATSPER4", "CYP3A5", "CYP3A7", "SCN2A", "SCN4A", "SCN5A", "SCN9A"] | 0       | 0        | 0.2   |

| Compound name                                 | MOA                                                                        | Targets                                                                                                                                                                                                                                                                                                                                                                                                                                                                    | RMPV750 | RMPV1500 | Conc.     |
|-----------------------------------------------|----------------------------------------------------------------------------|----------------------------------------------------------------------------------------------------------------------------------------------------------------------------------------------------------------------------------------------------------------------------------------------------------------------------------------------------------------------------------------------------------------------------------------------------------------------------|---------|----------|-----------|
| Mifepristone                                  | ["Glucocorticoid receptor antagonist", "Progesterone receptor antagonist"] | ["PGR", "NR3C1", "AR", "CYP2B6", "CYP2C8", "CYP3A5", "CYP3A7", "NR1I2"]                                                                                                                                                                                                                                                                                                                                                                                                    | 0.0727  | 0.0049   | 20        |
| Mitotane                                      | ["Antineoplastic"]                                                         | ["CYP11B1", "CYP11A1", "CYP3A4", "ESR1", "FDX1"]                                                                                                                                                                                                                                                                                                                                                                                                                           | 0.0165  | 0.1653   | 20        |
| Mitoxantrone                                  | ["Topoisomerase inhibitor"]                                                | ["TOP2A", "PIM1"]                                                                                                                                                                                                                                                                                                                                                                                                                                                          | 0.7198  | 0.1515   | 2         |
| Mycophenolic Acid                             | ["Dehydrogenase inhibitor", "Inositol monophosphatase inhibitor"]          | ["IMPDH1", "IMPDH2"]                                                                                                                                                                                                                                                                                                                                                                                                                                                       | 0       | 0        | 20        |
| N-p-Tosyl-L-phenylalanine chloromethyl ketone |                                                                            |                                                                                                                                                                                                                                                                                                                                                                                                                                                                            | 0.0004  | 0.0015   | 2         |
| NG-Monomethyl-L-arginine acetate              |                                                                            |                                                                                                                                                                                                                                                                                                                                                                                                                                                                            | 0.0577  | 0        | 20        |
| Nestorone                                     |                                                                            |                                                                                                                                                                                                                                                                                                                                                                                                                                                                            | 0.0007  | 0.0594   | 19.998523 |
| Nicardipine hydrochloride                     | ["Calcium channel blocker"]                                                | ["CACNA1C", "ADORA3", "ADRA1A", "ADRA1B", "ADRA1D", "CACNA1D", "CACNA2D1", "CACNB2", "CALM1", "CHRM1", "CHRM2", "CHRM3", "CHRM4", "CHRM5", "PDE1A", "PDE1B"]                                                                                                                                                                                                                                                                                                               | 0       | 0.0764   | 0.2       |
| Niclosamide                                   | ["DNA replication inhibitor", "STAT inhibitor"]                            | ["STAT3"]                                                                                                                                                                                                                                                                                                                                                                                                                                                                  | 0.0457  | 0        | 2         |
| Nisoldipine                                   | ["Calcium channel blocker"]                                                | ["CACNA1C", "CACNA1D", "CACNA1S", "CACNA2D1", "CACNB2", "CYP3A5"]                                                                                                                                                                                                                                                                                                                                                                                                          | 0       | 0        | 20        |
| Nitidine chloride                             |                                                                            |                                                                                                                                                                                                                                                                                                                                                                                                                                                                            |         |          | 20        |
| Nocodazole                                    | ["Tubulin inhibitor"]                                                      | ["HPGDS"]                                                                                                                                                                                                                                                                                                                                                                                                                                                                  | 0       | 0        | 20        |
| Nortriptyline hydrochloride                   | ["Tricyclic antidepressant"]                                               | ["KCNJ10", "SLC6A2", "SLC6A4", "ADRA1A", "ADRA1B", "ADRA1D", "ADRA2A", "ADRA2B", "ADRA2C", "ADRB1", "ADRB2", "ADRB3", "CHRM1", "CHRM2", "CHRM3", "CHRM4", "CHRM5", "CYP2C19", "DRD2", "HRH1", "HTR1A", "HTR2A", "HTR2C", "HTR6", "PGRMC1", "PIK3CD", "SIGMAR1"]                                                                                                                                                                                                            | 0       | 0        | 20        |
| Olanzapine                                    | ["Dopamine receptor antagonist", "Serotonin receptor antagonist"]          | ["DRD2", "HTR2A", "HTR2C", "DRD1", "DRD3", "DRD4", "HRH1", "HTR1A", "HTR1B", "HTR1D", "HTR1E", "HTR6", "HTR7", "ADRA1A", "ADRA1B", "ADRA2A", "ADRA2B", "ADRA2C", "ADRB1", "ADRB2", "ADRB3", "CHRM1", "CHRM2", "CHRM3", "CHRM4", "CHRM5", "CYP2C8", "DRD5", "GABRA1", "GABRA2", "GABRA3", "GABRA4", "GABRA5", "GABRA6", "GABRB1", "GABRB2", "GABRB3", "GABRD", "GABRE", "GABRG1", "GABRG2", "GABRG3", "GABRP", "GABRQ", "HRH2", "HRH4", "HTR1F", "HTR2B", "HTR3A", "HTR5A"] | 0.0076  | 0.0777   | 20        |

| Compound name                                      | MOA                                                              | Targets                                                                                                                                                             | RMPV750 | RMPV1500 | Conc.     |
|----------------------------------------------------|------------------------------------------------------------------|---------------------------------------------------------------------------------------------------------------------------------------------------------------------|---------|----------|-----------|
| Ouabain                                            | ["ATPase inhibitor"]                                             | ["ATP1A1", "ATP1A2", "ATP1A3", "ATP1A4", "ATP1B1", "ATP1B2", "ATP1B3", "ATP1B4", "FXD2"]                                                                            | 0       | 0        | 20        |
| PAPP                                               |                                                                  |                                                                                                                                                                     | 0       | 0        | 0.2       |
| PD-407824                                          |                                                                  |                                                                                                                                                                     |         | 0        | 20        |
| PD153035 hydrochloride                             |                                                                  |                                                                                                                                                                     | 0.0068  | 0.0057   | 19.998253 |
| PF-429242 dihydrochloride                          |                                                                  |                                                                                                                                                                     | 0       | 0        | 20        |
| PMEG hydrate                                       |                                                                  |                                                                                                                                                                     |         | 0        | 20        |
| Palonosetron hydrochloride                         | ["Serotonin receptor antagonist"]                                | ["HTR3A"]                                                                                                                                                           | 0       | 0.004    | 0.02      |
| Paroxetine hydrochloride hemihydrate (MW = 374.83) | ["Selective serotonin reuptake inhibitor (SSRI)"]                | ["SLC6A4", "CHRM1", "CHRM2", "CHRM3", "CHRM4", "CHRM5", "HTR2A", "SLC6A2"]                                                                                          | 0       | 0        | 20.000106 |
| Parthenolide                                       |                                                                  |                                                                                                                                                                     |         |          | 20        |
| Pazopanib                                          | ["KIT inhibitor", "PDGFR receptor inhibitor", "VEGFR inhibitor"] | ["KDR", "KIT", "FLT1", "FLT4", "PDGFRB", "PDGFRA", "BRAF", "CSF1R", "CYP2B6", "CYP2C8", "CYP2E1", "DDR2", "FGF1", "FGFR1", "FGFR3", "ITK", "SH2B3"]                 | 0.0037  | 0        | 20        |
| Pentamidine                                        |                                                                  | ["TRDMT1"]                                                                                                                                                          | 0       | 0        | 20        |
| Pentamidine isethionate                            |                                                                  | ["TRDMT1"]                                                                                                                                                          | 0       |          | 20        |
| Pergolide methanesulfonate                         | ["Dopamine receptor agonist"]                                    | ["DRD1", "DRD2", "ADRA2A", "ADRA2B", "ADRA2C", "DRD3", "DRD4", "DRD5", "HTR1A", "HTR1B", "HTR1D", "HTR2A", "HTR2B", "HTR2C", "ADRA1A", "ADRA1B", "ADRA1D", "KCNA5"] | 0       | 0.0512   | 2         |
| Perphenazine                                       | ["Dopamine receptor antagonist"]                                 | ["DRD2", "CALM1", "DRD1", "HRH1", "HTR2A", "HTR2C", "HTR6", "HTR7"]                                                                                                 | 0.0039  | 0.0125   | 0.02      |
| Phenamil methanesulfonate                          | ["TRPV antagonist"]                                              | ["PKD2L1"]                                                                                                                                                          | 0.0325  | 0.1496   | 2         |
| Pheniramine maleate                                | ["Histamine receptor antagonist"]                                | ["HRH1"]                                                                                                                                                            | 0.0169  | 0.0024   | 20        |
| Phorbol 12-myristate 13-acetate                    | ["PKC activator"]                                                | ["CD4", "KCNT2", "PRKCA", "TRPV4"]                                                                                                                                  | 0       | 0        | 2         |
| Pifithrin-mu                                       | ["HSP inhibitor"]                                                | ["HSPA1A", "TP53"]                                                                                                                                                  | 0       | 0.0003   | 2         |
| Pimozide                                           | ["Dopamine receptor antagonist"]                                 | ["DRD2", "DRD3", "CACNA1I", "CALM1", "HRH1", "HTR1A", "HTR2A", "KCNA10", "KCNH2"]                                                                                   | 0.001   | 0.0174   | 20        |
| Piperlongumine                                     | ["Glutathione transferase inhibitor"]                            | String[]                                                                                                                                                            | 0.0747  | 0.0144   | 2         |
| Podophyllotoxin                                    | ["Microtubule inhibitor", "Tubulin inhibitor"]                   | ["IGF1R", "CASP3", "TOP2A", "TUBA4A", "TUBB"]                                                                                                                       | 0.001   | 0        | 2         |
| Prazosin hydrochloride                             | ["Adrenergic receptor antagonist"]                               | ["ADRA1A", "ADRA1B", "ADRA1D", "ADRA2A", "ADRA2B", "ADRA2C", "CDK1", "KCNH2", "KCNH6", "KCNH7"]                                                                     | 0       | 0.0003   | 0.2       |
| Progesterone                                       |                                                                  | ["PGR", "CYP17A1", "NR3C2", "CATSPER1", "CATSPER2", "CATSPER3", "CATSPER4", "CYP2C19", "ESR1", "OPRK1", "TRPC5"]                                                    | 0       | 0        | 20        |

| Compound name                      | MOA                                                                              | Targets                                                                                                                               | RMPV750 | RMPV1500 | Conc.     |
|------------------------------------|----------------------------------------------------------------------------------|---------------------------------------------------------------------------------------------------------------------------------------|---------|----------|-----------|
| Proguanil                          | ["Dihydrofolate reductase inhibitor"]                                            | ["CYP2C19", "DHFR"]                                                                                                                   | 0.0016  | 0        | 20        |
| Promazine hydrochloride            | ["Dopamine receptor antagonist"]                                                 | ["CHRM5", "DRD2", "ADRA1A", "ADRA1B", "ADRA1D", "CHRM1", "CHRM2", "CHRM3", "CHRM4", "DRD1", "DRD3", "DRD4", "HRH1", "HTR2A", "HTR2C"] | 0.0243  | 0        | 2         |
| Propafenone hydrochloride          | ["Antiarrhythmic"]                                                               | ["KCNH2", "SCN5A", "ADRB1", "ADRB2", "KCNA5", "KCNK2", "KCNK3"]                                                                       | 0       | 0        | 20        |
| Propionylpromazine hydrochloride   |                                                                                  |                                                                                                                                       | 0       | 0        | 20        |
| Protriptyline hydrochloride        | ["Tricyclic antidepressant"]                                                     | ["SLC6A2", "SLC6A4"]                                                                                                                  | 0       | 0        | 20        |
| Psoralidin                         |                                                                                  |                                                                                                                                       | 0       | 0        | 20        |
| Pyridostatin trifluoroacetate salt |                                                                                  |                                                                                                                                       | 0       | 0.1911   | 20        |
| Quinacrine dihydrochloride         |                                                                                  |                                                                                                                                       |         |          | 20        |
| Quinidine sulfate                  |                                                                                  |                                                                                                                                       |         | 0        | 20        |
| RN-9893                            |                                                                                  |                                                                                                                                       | 0.2081  | 0.1042   | 0.02      |
| RU-SKI 43 maleate                  |                                                                                  |                                                                                                                                       | 0       | 0        | 20        |
| Rabeprazole sodium                 | ["ATPase inhibitor", "Gastrin inhibitor"]                                        | ["ATP4A", "CYP2C19"]                                                                                                                  | 0.0919  | 0        | 20.000126 |
| Raloxifene hydrochloride           | ["Estrogen receptor antagonist", "Selective estrogen receptor modulator (SERM)"] | ["ESR1", "ESR2", "ACVRL1", "ENG"]                                                                                                     | 0       | 0        | 20        |
| Ranolazine dihydrochloride         | ["Sodium channel blocker"]                                                       | ["SCN9A", "SCN10A", "SCN5A", "SLC22A2"]                                                                                               | 0.0022  | 0.0209   | 2         |
| Reserpine                          | ["Vesicular monoamine transporter inhibitor"]                                    | ["SLC18A2", "SLC18A1"]                                                                                                                | 0       | 0        | 20        |
| Ro 11-1464                         |                                                                                  |                                                                                                                                       | 0.0028  | 0        | 20        |
| Ro 90-7501                         | ["Beta amyloid inhibitor"]                                                       | ["APP"]                                                                                                                               | 0       | 0.0012   | 20        |
| Roscovitine                        | ["CDK inhibitor"]                                                                | ["CDK2", "CDK9", "CDK7", "CDK1", "CDK5"]                                                                                              | 0       | 0        | 20        |
| Rotenone                           |                                                                                  | ["MT-ND1"]                                                                                                                            | 0.0004  | 0        | 20        |
| Ruthenium red                      |                                                                                  |                                                                                                                                       | 0.0627  | 0        | 20        |
| S-(+)-Fluoxetine hydrochloride     |                                                                                  |                                                                                                                                       | 0       | 0.2889   | 2         |
| S-Methylisothiurea hemisulfate     |                                                                                  |                                                                                                                                       | 0.0518  | 0.2182   | 20        |
| SB 202190                          | ["p38 MAPK inhibitor"]                                                           | ["MAPK14", "AKT1", "ALOX5", "CHEK1", "GSK3B", "LCK", "MAPK1", "MAPK11", "MAPK12", "MAPK8", "PRKCA", "ROCK1", "RPS6KB1", "SGK1"]       | 0       | 0        | 2.0000599 |
| SB 415286                          | ["Glycogen synthase kinase inhibitor"]                                           | ["GSK3B", "GSK3A", "RPS6KB1"]                                                                                                         | 0       | 0.0012   | 20        |
| SB743921 hydrochloride             |                                                                                  |                                                                                                                                       | 0       | 0        | 20        |
| SID 3712249                        |                                                                                  |                                                                                                                                       | 0.0025  | 0        | 20        |
| SKF 83959 hydrobromide             |                                                                                  |                                                                                                                                       | 0.0457  | 0        | 20        |
| SMER28                             |                                                                                  |                                                                                                                                       | 0       | 0        | 20        |
| SP600125                           |                                                                                  |                                                                                                                                       | 0       | 0        | 20        |
| SR 59230A oxalate                  | ["Adrenergic receptor antagonist"]                                               | ["ADRB3", "ADRB1", "ADRB2"]                                                                                                           | 0.0107  | 0        | 20        |
| SR9243                             |                                                                                  |                                                                                                                                       | 0.0694  | 0.0012   | 20        |
| SU 5416                            |                                                                                  |                                                                                                                                       | 0.0212  | 0.3581   | 2         |

| Compound name                   | MOA                                                                                                                                      | Targets                                                                                                                                                                                                                     | RMPV750 | RMPV1500 | Conc.     |
|---------------------------------|------------------------------------------------------------------------------------------------------------------------------------------|-----------------------------------------------------------------------------------------------------------------------------------------------------------------------------------------------------------------------------|---------|----------|-----------|
| SU1498                          |                                                                                                                                          |                                                                                                                                                                                                                             | 0       | 0        | 20        |
| Sanguinarine chloride           |                                                                                                                                          |                                                                                                                                                                                                                             |         |          | 20        |
| Sertaconazole nitrate           | ["Sterol demethylase inhibitor"]                                                                                                         | String[]                                                                                                                                                                                                                    | 0.0119  | 0        | 20        |
| Stattic                         |                                                                                                                                          |                                                                                                                                                                                                                             |         |          | 20        |
| Sunitinib                       | ["FLT3 inhibitor", "KIT inhibitor", "PDGFR receptor inhibitor", "RET tyrosine kinase inhibitor", "VEGFR inhibitor"]                      | ["FLT3", "KDR", "KIT", "FLT4", "FLT1", "PDGFRA", "PDGFRB", "RET", "CSF1R", "FGFR1"]                                                                                                                                         | 0       | 0.3832   | 20        |
| Supercinnamaldehyde             |                                                                                                                                          |                                                                                                                                                                                                                             | 0       | 0.0144   | 20        |
| Suprafenacine                   |                                                                                                                                          |                                                                                                                                                                                                                             | 0       | 0        | 20        |
| T0070907                        |                                                                                                                                          |                                                                                                                                                                                                                             | 0       | 0        | 20        |
| TBBz                            |                                                                                                                                          |                                                                                                                                                                                                                             | 0.001   | 0.0026   | 2         |
| TIC10 angular                   |                                                                                                                                          |                                                                                                                                                                                                                             | 0       | 0        | 20        |
| Tacrine                         | ["Acetylcholinesterase inhibitor", "Acetylcholine release stimulant", "Butyrylcholinesterase inhibitor", "Potassium channel antagonist"] | ["ACHE", "BCHE"]                                                                                                                                                                                                            | 0       | 0        | 20        |
| Tamoxifen citrate               |                                                                                                                                          |                                                                                                                                                                                                                             |         |          | 20        |
| Taurine                         |                                                                                                                                          |                                                                                                                                                                                                                             | 0       | 0.4691   | 20        |
| Testosterone                    | ["Androgen receptor agonist"]                                                                                                            | ["AR", "CYP19A1", "CYP2C19", "CYP2C8", "CYP3A5"]                                                                                                                                                                            | 0.0126  | 0.0554   | 20        |
| Tetraethylthiuram disulfide     |                                                                                                                                          |                                                                                                                                                                                                                             |         |          | 20        |
| Thiabendazole                   |                                                                                                                                          |                                                                                                                                                                                                                             | 0.0103  | 0.0012   | 20        |
| Thiocolchicine                  |                                                                                                                                          |                                                                                                                                                                                                                             | 0       | 0        | 20        |
| Tirapazamine                    |                                                                                                                                          |                                                                                                                                                                                                                             | 0.0007  | 0.0021   | 2.2628831 |
| Tizanidine hydrochloride        | ["Adrenergic receptor agonist"]                                                                                                          | ["ADRA2A", "ADRA2B", "ADRA2C", "CYP1A2", "NISCH"]                                                                                                                                                                           | 0       | 0        | 20        |
| Tolazoline                      | ["Adrenergic receptor antagonist"]                                                                                                       | ["ADRA2A", "ADRA2B", "ADRA2C", "ADRA1A", "HRH1", "HRH2"]                                                                                                                                                                    | 0.0338  | 0.1042   | 20        |
| Topotecan hydrochloride hydrate | ["Topoisomerase inhibitor"]                                                                                                              | ["TOP1", "TOP1MT"]                                                                                                                                                                                                          | 0       | 0        | 2         |
| Torin2                          |                                                                                                                                          |                                                                                                                                                                                                                             | 0       | 0        | 20        |
| Trifluoperidol hydrochloride    |                                                                                                                                          |                                                                                                                                                                                                                             | 0.0007  | 0        | 20        |
| Triflupromazine hydrochloride   | ["Dopamine receptor antagonist"]                                                                                                         | ["HTR2B", "CHRM1", "CHRM2", "CHRNA7", "DRD1", "DRD2"]                                                                                                                                                                       | 0       | 0        | 20        |
| Trihexyphenidyl                 |                                                                                                                                          | ["CHRM1", "CHRM2", "CHRM3", "CHRM4", "CHRM5"]                                                                                                                                                                               | 0.0467  | 0.1044   | 0.2       |
| Trilostane                      |                                                                                                                                          |                                                                                                                                                                                                                             | 0       | 0        | 20        |
| Trimipramine maleate            | ["Norepinephrine reuptake inhibitor", "Tricyclic antidepressant"]                                                                        | ["SLC6A2", "SLC6A4", "SLC6A3", "ADRA1A", "ADRA1B", "ADRA2A", "ADRA2B", "ADRB1", "ADRB2", "ADRB3", "CHRM1", "CHRM2", "CHRM3", "CHRM4", "CHRM5", "DRD1", "DRD2", "DRD5", "HRH1", "HTR1A", "HTR1D", "HTR2A", "HTR2C", "HTR3A"] | 0.0216  | 0        | 20        |
| Tyrphostin AG 879               |                                                                                                                                          |                                                                                                                                                                                                                             | 0       | 0        | 20        |
| U-101958 maleate                |                                                                                                                                          |                                                                                                                                                                                                                             | 0.3587  | 0.1733   | 2         |

| Compound name                 | MOA                                                   | Targets                                                        | RMPV750 | RMPV1500 | Conc. |
|-------------------------------|-------------------------------------------------------|----------------------------------------------------------------|---------|----------|-------|
| U-62066                       |                                                       |                                                                | 0.5627  | 0.0015   | 20    |
| U0126                         |                                                       | ["JAK2", "MAP2K1", "MAP2K2", "MAP3K1", "MAP3K2"]               | 0       | 0        | 20    |
| UNC0379 trifluoroacetate salt |                                                       |                                                                | 0.0013  | 0        | 2     |
| Vinblastine                   | ["Microtubule inhibitor", "Tubulin inhibitor"]        | ["TUBB", "JUN", "TUBA1A", "TUBD1", "TUBE1", "TUBG1"]           | 0       | 0.1859   | 20    |
| Vincristine sulfate           |                                                       | ["TUBB", "TUBA4A"]                                             | 0.0004  | 0        | 20    |
| Vorinostat                    |                                                       |                                                                |         |          | 20    |
| WIN 62,577                    |                                                       |                                                                | 0.0101  | 0.0021   | 2     |
| WZ4003                        |                                                       |                                                                | 0       | 0        | 0.2   |
| Wiskostatin                   | ["Neural Wiskott-Aldrich syndrome protein inhibitor"] | ["WAS", "WASL"]                                                | 0       | 0        | 20    |
| XL388                         |                                                       |                                                                | 0       | 0        | 20    |
| Y-27632 dihydrochloride       | ["Rho associated kinase inhibitor"]                   | ["ROCK1", "ROCK2", "LRRK2", "PKIA", "PKN2", "PRKACA", "PRKCE"] | 0.0268  | 0.0057   | 0.2   |
| Yoda1                         |                                                       |                                                                | 0       | 0.0443   | 2     |
| alpha-Lobeline hydrochloride  |                                                       |                                                                | 0.0107  | 0.0347   | 0.02  |
| beta-Lapachone                |                                                       |                                                                |         |          | 20    |

**Supp. Table 1: Compound list in chemical HCS experiment.** Description of the name of the screened compounds (CompoundName), their mechanisms of action (MOA) and genetic targets (Targets), their robust morphological perturbation value (FDR-corrected p-value for a comparison to matching DMSO controls) computed on the plate seeded with 750 cells (RMPV750) or 1500 cells (RMPV1500), as well as their concentration in  $\mu\text{M}$  (Conc.). For a machine-readable version of this table, see FigShare dataset (DOI: 10.1101/2021.06.18.448961). For accessing the data programatically see the GitHub repository (DOI: 10.5281/zenodo.5659932).



| Rank | Feature                                           | Type                               | Object  |
|------|---------------------------------------------------|------------------------------------|---------|
| 1    | Granularity_10_CorrCM_median                      | Granularity, CellMask              | Cell    |
| 2    | Granularity_9_CorrCM_median                       | Granularity, CellMask              | Cell    |
| 3    | AreaShape_FormFactor_1_median                     | Shape                              | Nucleus |
| 4    | AreaShape_Solidity_median                         | Shape                              | Cell    |
| 5    | AreaShape_Zernike_3_1_1_median                    | Shape                              | Cell    |
| 6    | Intensity_MassDisplacement_CorrDNA_1_median       | Intensity distribution, DAPI       | Nucleus |
| 7    | Granularity_7_CorrActin_median                    | Granularity, Phalloidin            | Cell    |
| 8    | AreaShape_Compactness_median                      | Shape                              | Cell    |
| 9    | AreaShape_Compactness_1_median                    | Shape                              | Nucleus |
| 10   | RadialDistribution_RadialCV_CorrActin_2of3_median | Intensity distribution, Phalloidin | Cell    |

**Supp. Table 2: Top 10 most variable features for the plate seeded with 750 cells per well.** Features are ranked by decreasing median absolute deviation. As the data is normalized on the DMSO controls, this corresponds to the features varying the most in response to chemical perturbations across the plate.

| MOA                                    | Feature 1                                              | Feature 2                                             | Feature 3                                              | Feature 4                            |
|----------------------------------------|--------------------------------------------------------|-------------------------------------------------------|--------------------------------------------------------|--------------------------------------|
| Glycogen synthase kinase inhibitor     | RadialDistribution_ZernikeMagnitude_CorrDNA_7_3_median | AreaShape_Zernike_8_6_1_median                        | RadialDistribution_ZernikeMagnitude_CorrCM_9_3_median  | Intensity_MADIntensity_CorrCM_median |
| CDK inhibitor                          | AreaShape_Zernike_8_6_1_median                         | RadialDistribution_ZernikeMagnitude_CorrCM_9_3_median | Intensity_MaxIntensity_CorrCM_median                   | AreaShape_Zernike_4_0_1_median       |
| Histamine receptor antagonist          | AreaShape_Zernike_4_2_2_median                         | AreaShape_Zernike_4_0_1_median                        | RadialDistribution_ZernikeMagnitude_CorrCM_9_3_median  | Intensity_MaxIntensity_CorrCM_median |
| Selective serotonin reuptake inhibitor | AreaShape_Zernike_4_2_2_median                         | AreaShape_Zernike_4_0_1_median                        | RadialDistribution_ZernikeMagnitude_CorrDNA_7_3_median | Granularity_1_CorrActin_median       |
| Norepinephrine reuptake inhibitor      | AreaShape_Zernike_4_2_2_median                         | AreaShape_Zernike_4_0_1_median                        | RadialDistribution_ZernikeMagnitude_CorrDNA_7_3_median | AreaShape_Zernike_9_3_2_median       |

**Supp. Table 3: Top 4 most distinctive features (absolute log-fold change of mean field-of-view profiles) as compared to DMSO controls, for selected Mechanisms Of Actions (MOAs) for the plate seeded with 750 cells per well. Recurrent features are colored consistently across MOAs.**
